# Supplementary material for: Effect of the Strawberry Genotype, Cultivation and Processing on the Fra a 1 Allergen Content
Source: PubMed Central journal article supplement (PMC6073608; doi:10.3390/nu10070857), 2018-07-02
Supplement: nutrients-10-00857-s001.pdf [file nutrients-10-00857-s001.pdf]

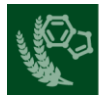

# Supplemental data

## Effect of the strawberry genotype, cultivation and processing on the

### Fra a 1 allergen content

**Elisabeth Kurze**<sup>1</sup>, **Vanessa Kock**<sup>1</sup>, **Roberto Lo Scalzo**<sup>2</sup>, **Klaus Olbricht**<sup>3,4</sup>, **Wilfried Schwab**<sup>1,\*</sup>

<sup>1</sup> Biotechnology of Natural Products, Technische Universität München, Liesel-Beckmann-Str.1, 85354 Freising, Germany; elisabeth.kurze@tum.de; vanessa.kock@tum.de; wilfried.schwab@tum.de

<sup>2</sup> Consiglio per la ricerca in agricoltura e l'analisi dell'economia agraria, Unità di ricerca per i processi dell'industria agroalimentare (CREA-IAA), via Venezian 26, 20133 Milan, Italy; roberto.loscalzo@crea.gov.it

<sup>3</sup> Hansabred GmbH & Co. KG, Radeburger Landstr. 12, 01108 Dresden, Germany; k.olbricht@hansabred.org

<sup>4</sup> Humboldt-Universität zu Berlin, Albrecht Daniel Thaer-Institute, Berlin, Germany

**Figure S1. Protein pattern of strawberry extracts.**

**Figure S2. Standard curve of indirect competitive ELISA.**

**Table S1. Strawberry cultivars**

**Table S2. Growing conditions for conventional and organic strawberry cv. Asia cultivated in Italy, Forlì-Cesena district.**

**Table S3. Temperature and relative humidity at the growing location Forlì-Cesena in Italy for April and May in the years 2015 to 2017; National Agrometeorological DataBase of Italy SIAN (National Agricultural Information System)**

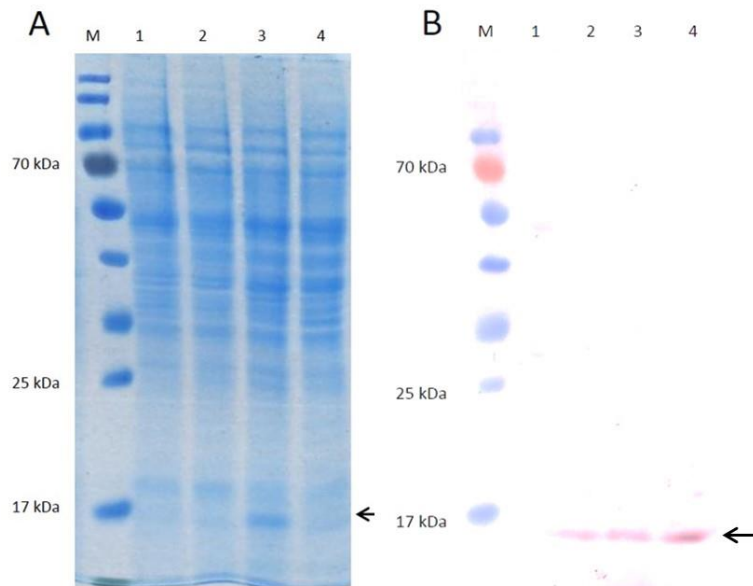

**Figure S1. Protein pattern of strawberry extracts.**

Native strawberry protein extracts of commercially available cultivars analyzed by (A) SDS-PAGE and (B) Western-Blot analysis. 1 – Fruits (unknown cultivar) from grocery store strawberry, 2 – Elsanta, 3 – Florika, 4 – Magnum. SDS-PAGE was performed under reducing conditions. For protein staining coomassie Brilliant Blue G250 was used. Western blot analysis was performed using a specific polyclonal Fra a 1.02-antibody. The 18 kDa band, corresponding to the native Fra a 1, is marked with an arrow. M: PageRuler Prestained Protein Ladder

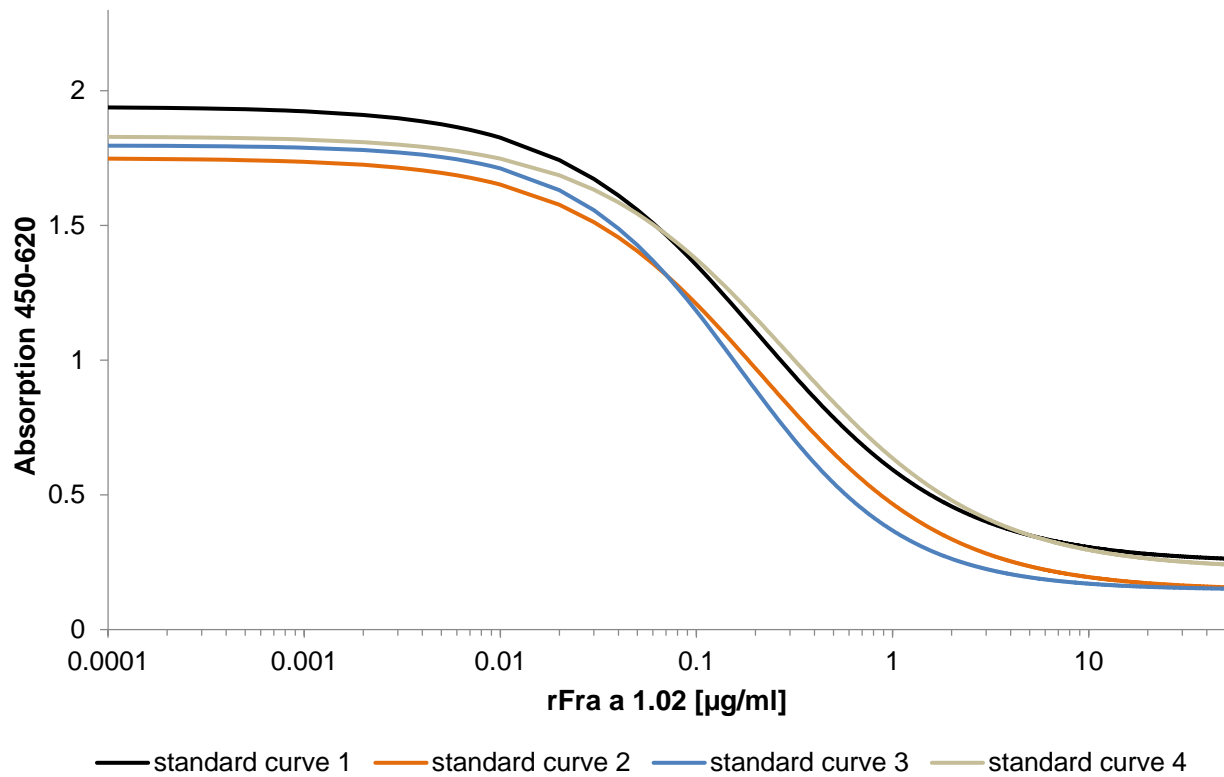

**Figure S2. Standard curve of indirect competitive ELISA.**

Competitive ELISA was performed using serial dilutions of rFra a 1.02 as free allergen. From the standard curves obtained at different days the concentration of Fra a 1 in µg/ml in various strawberry samples was calculated using the 4-paramter plot.

**Table S1. Strawberry cultivars**

Fra a 1 content (mean values) in  $\mu\text{g/g}$  FW, total soluble protein in  $\mu\text{g/g}$  FW and percentage of Fra a 1/total soluble protein of different strawberries. Plants were grown at Hansabred (Dresden, Munich).

| variety               | cultivar             | color  | Fra a 1<br>[ $\mu\text{g/g}$ FW] | total soluble protein<br>[ $\text{mg/g}$ FW] | % Fra a 1/total<br>soluble protein |
|-----------------------|----------------------|--------|----------------------------------|----------------------------------------------|------------------------------------|
| <i>F. × ananassa</i>  | Elianny              | red    | 0.881 ± 0.91                     | 1.014 ± 0.058                                | 0.087                              |
| <i>F. × ananassa</i>  | Elsanta              | red    | 0.931 ± 0.27                     | 1.002 ± 0.039                                | 0.093                              |
| <i>F. × ananassa</i>  | Faith                | red    | 0.945 ± 0.31                     | 0.888 ± 0.050                                | 0.106                              |
| <i>F. × ananassa</i>  | Königin Luise        | red    | 1.025 ± 0.24                     | 1.290 ± 0.104                                | 0.079                              |
| <i>F. × ananassa</i>  | Korona               | red    | 1.185 ± 0.42                     | 1.085 ± 0.064                                | 0.109                              |
| <i>F. × ananassa</i>  | Magnum               | red    | 1.231 ± 0.28                     | 1.168 ± 0.112                                | 0.105                              |
| <i>F. × ananassa</i>  | Mieze Schindler      | red    | 0.985 ± 0.26                     | 1.250 ± 0.065                                | 0.079                              |
| <i>F. × ananassa</i>  | Oberschlesien        | red    | 0.957 ± 0.26                     | 1.023 ± 0.077                                | 0.094                              |
| <i>F. × ananassa</i>  | Renaissance          | red    | 0.968 ± 0.23                     | 1.102 ± 0.043                                | 0.088                              |
| <i>F. × ananassa</i>  | Snow White           | white  | 2.343 ± 0.75                     | 0.981 ± 0.075                                | 0.239                              |
| <i>F. chiloensis</i>  | Lucida Perfecta      | white  | 1.938 ± 0.66                     | 1.359 ± 0.136                                | 0.143                              |
| <i>F. moschata</i>    | Profumata di Tortona | red    | 2.378 ± 1.02                     | 1.441 ± 0.119                                | 0.165                              |
| <i>F. moschata</i>    | Wuerzburg            | red    | 2.696 ± 0.79                     | 1.590 ± 0.089                                | 0.169                              |
| <i>F. nilgerensis</i> | Leigong              | white  | 0.686 ± 0.13                     | 1.722 ± 0.127                                | 0.039                              |
| <i>F. nilgerensis</i> | Yunnan               | white  | 1.339 ± 0.35                     | 1.502 ± 0.163                                | 0.089                              |
| <i>F. vesca</i>       | Grotta del Vento     | red    | 0.818 ± 0.24                     | 1.794 ± 0.138                                | 0.046                              |
| <i>F. vesca</i>       | Moritzburg           | yellow | 0.937 ± 0.27                     | 1.858 ± 0.104                                | 0.050                              |
| <i>F. vesca</i>       | Reine des Vallées    | red    | 1.111 ± 0.43                     | 2.044 ± 0.115                                | 0.054                              |
| <i>F. vesca</i>       | Yellow Wonder        | yellow | 1.331 ± 0.43                     | 1.920 ± 0.062                                | 0.069                              |
| <i>F. × vesana</i>    | Florika              | red    | 3.817 ± 1.28                     | 1.385 ± 0.155                                | 0.276                              |

**Table S2. Growing conditions for conventional and organic strawberry cv. Asia cultivated in Italy, Forlì-Cesena district.**

|                                 | conventional                                                      | organic                                                                                                                                                                                  |
|---------------------------------|-------------------------------------------------------------------|------------------------------------------------------------------------------------------------------------------------------------------------------------------------------------------|
| <b>Name of Farm</b>             | Integrated “Burioli Claudio”                                      | Organic “Guardigni Paola”                                                                                                                                                                |
| <b>Location</b>                 | S. Martino in fiume (Cesena)                                      | S. Martino in fiume (Cesena)                                                                                                                                                             |
| <b>Dimension</b>                | 8 hectares                                                        | 10 hectares                                                                                                                                                                              |
| <b>Age of the farm</b>          | -                                                                 | 10 years                                                                                                                                                                                 |
| <b>Type of cultivation</b>      | no-forced tunnel                                                  | semi-forced tunnel                                                                                                                                                                       |
| <b>Plant transplant</b>         | July                                                              | July                                                                                                                                                                                     |
| <b>Closing of tunnel</b>        | May                                                               | March                                                                                                                                                                                    |
| <b>Planting spacing</b>         | 0.35 per 0.30 m                                                   | 0.35 per 0.30 m                                                                                                                                                                          |
| <b>Total production</b>         | 900 g/plant                                                       | 850 g/plant                                                                                                                                                                              |
| <b>Marketable production</b>    | 750 g/plant                                                       | 700 g/plant                                                                                                                                                                              |
| <b>Fertilization</b>            | 8-24-16 NPK, three times, 15 g/plant<br>Sequestrene, 0.05 g/plant | Autumn cereal grass ( <i>Triticum</i> spp.)<br>green manure at the end of April<br>solid organic manure in June (before transplant)<br>fertirrigation with products approved for Organic |
| <b>Treatments of pesticides</b> | commonly used anti-fungal and insecticides                        | Copper, Neem oil, Phytoseiids (against Spider mite)                                                                                                                                      |
| <b>Harvest dates</b>            | 20 May 2015<br>24 May 2016<br>11 May 2017                         | 20 May 2015<br>24 May 2016<br>11 May 2017                                                                                                                                                |
| <b>Product destination</b>      | cooperative and direct sale                                       | direct sale                                                                                                                                                                              |

**Table S3. Temperature and relative humidity at the growing location Forlì-Cesena in Italy for April and May in the years 2015 to 2017; National Agrometeorological DataBase of Italy SIAN (National Agricultural Information System)**

|                                  | Year | Month |                                |      |                                |
|----------------------------------|------|-------|--------------------------------|------|--------------------------------|
|                                  |      | April | Historical Data<br>(1960-1990) | May  | Historical Data<br>(1960-1990) |
| <b>T<sub>min</sub> [°C]</b>      | 2015 | 7.5   |                                | 13.2 |                                |
|                                  | 2016 | 9.0   | 8.2                            | 11.6 | 12.2                           |
|                                  | 2017 | 7.6   |                                | 12.1 |                                |
| <b>T<sub>max</sub> [°C]</b>      | 2015 | 20.7  |                                | 26.5 |                                |
|                                  | 2016 | 22.0  | 18.0                           | 25.6 | 24.1                           |
|                                  | 2017 | 21.0  |                                | 24.8 |                                |
| <b>T<sub>mean</sub> [°C]</b>     | 2015 | 14.1  |                                | 19.8 |                                |
|                                  | 2016 | 15.5  | 13.1                           | 18.6 | 18.2                           |
|                                  | 2017 | 14.3  |                                | 18.5 |                                |
| <b>relative<br/>humidity [%]</b> | 2015 | 85    |                                | 69   |                                |
|                                  | 2016 | 82    |                                | 82   |                                |
|                                  | 2017 | 81    |                                | 71   |                                |
